# Supplementary material for: Comparative genetics of Enterococcus faecalis intestinal tissue isolates before and after surgery in a rat model of colon anastomosis
Source: PubMed Central journal article supplement (PMC7188289; doi:10.1371/journal.pone.0232165), 2020-04-28

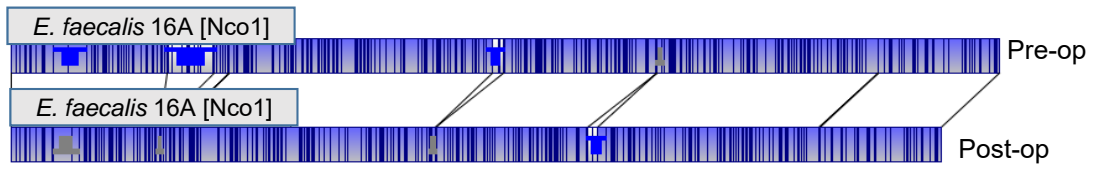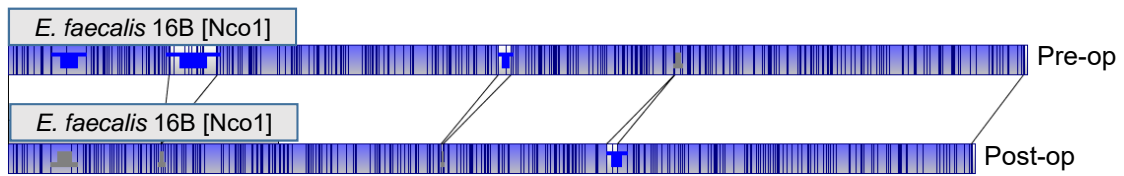

Supplement: pone.0232165.s006.pdf [file pone.0232165.s006.pdf]
