# Supplementary material for: Comparative genetics of Enterococcus faecalis intestinal tissue isolates before and after surgery in a rat model of colon anastomosis
Source: PLoS One. 2020 Apr 28;15(4):e0232165. doi: 10.1371/journal.pone.0232165 (PMC7188289; doi:10.1371/journal.pone.0232165)
Supplement: S2 Table — (XLSX) [file pone.0232165.s002.xlsx]

## Sheet: Sheet1
Preop16 gene	Preop 16 contig	Preop 16 start	Preop 16 end	Gene product	Gene inference
AR682_00260	preop_v2_contig1	55040	55296	hypothetical protein	COORDINATES: similar to AA sequence:RefSeq:WP_002370609.1
AR682_00620	preop_v2_contig2	6	720	aggregation substance	COORDINATES: similar to AA sequence:RefSeq:NP_813951.1
AR682_02040	preop_v2_contig2	247604	248774	site-specific integrase	COORDINATES: similar to AA sequence:RefSeq:NP_814262.1
AR682_02045	preop_v2_contig2	248817	249048	DNA-binding protein	COORDINATES: similar to AA sequence:RefSeq:NP_814263.1
AR682_02055	preop_v2_contig2	249358	249579	hypothetical protein	COORDINATES: similar to AA sequence:RefSeq:WP_002347602.1
AR682_02060	preop_v2_contig2	249569	249758	hypothetical protein	COORDINATES: similar to AA sequence:RefSeq:WP_002412374.1
AR682_02065	preop_v2_contig2	249903	250149	helix-turn-helix domain-containing protein	COORDINATES: similar to AA sequence:RefSeq:NP_814264.1
AR682_02070	preop_v2_contig2	250142	250544	sigma-70 family RNA polymerase sigma factor	COORDINATES: similar to AA sequence:RefSeq:NP_814265.1
AR682_02075	preop_v2_contig2	251617	251836	hypothetical protein	COORDINATES: similar to AA sequence:RefSeq:WP_002399643.1
AR682_02080	preop_v2_contig2	252528	256446	aggregation substance	COORDINATES: similar to AA sequence:RefSeq:NP_814266.1
AR682_02090	preop_v2_contig2	256885	257272	hypothetical protein	COORDINATES: similar to AA sequence:RefSeq:NP_814268.1
AR682_02095	preop_v2_contig2	257205	257397	hypothetical protein	COORDINATES: similar to AA sequence:RefSeq:WP_002400638.1
AR682_02100	preop_v2_contig2	257417	257678	hypothetical protein	COORDINATES: similar to AA sequence:RefSeq:NP_814269.1
AR682_02105	preop_v2_contig2	257688	258567	hypothetical protein	COORDINATES: similar to AA sequence:RefSeq:NP_814270.1
AR682_02110	preop_v2_contig2	258586	259402	cell surface protein	COORDINATES: similar to AA sequence:RefSeq:NP_816967.1
AR682_02115	preop_v2_contig2	259427	260699	amidase	COORDINATES: similar to AA sequence:RefSeq:NP_814272.1
AR682_02120	preop_v2_contig2	260701	261319	hypothetical protein	COORDINATES: similar to AA sequence:RefSeq:NP_816965.1
AR682_02125	preop_v2_contig2	261350	261719	hypothetical protein	COORDINATES: similar to AA sequence:RefSeq:NP_814274.1
AR682_02130	preop_v2_contig2	261718	262033	hypothetical protein	COORDINATES: similar to AA sequence:RefSeq:NP_814275.1
AR682_02135	preop_v2_contig2	262025	263060	conjugal transfer protein	COORDINATES: similar to AA sequence:RefSeq:NP_816962.1
AR682_02140	preop_v2_contig2	263049	263325	hypothetical protein	COORDINATES: similar to AA sequence:RefSeq:NP_816961.1
AR682_02145	preop_v2_contig2	263321	263714	conjugal transfer protein	COORDINATES: similar to AA sequence:RefSeq:NP_814278.1
AR682_02150	preop_v2_contig2	263745	264228	hypothetical protein	COORDINATES: similar to AA sequence:RefSeq:NP_814279.1
AR682_02155	preop_v2_contig2	264322	264781	single-stranded DNA-binding protein	COORDINATES: similar to AA sequence:RefSeq:NP_814280.1
AR682_02160	preop_v2_contig2	264885	267378	type VI secretion protein	COORDINATES: similar to AA sequence:RefSeq:NP_814281.1
AR682_02165	preop_v2_contig2	267388	267733	lipoprotein	COORDINATES: similar to AA sequence:RefSeq:NP_814282.1
AR682_02170	preop_v2_contig2	267745	270091	hypothetical protein	COORDINATES: similar to AA sequence:RefSeq:NP_814283.1
AR682_02175	preop_v2_contig2	270077	272336	type VI secretion protein	COORDINATES: similar to AA sequence:RefSeq:NP_814284.1
AR682_02180	preop_v2_contig2	272337	272508	hypothetical protein	COORDINATES: similar to AA sequence:RefSeq:NP_814285.1
AR682_02185	preop_v2_contig2	272915	273644	ArsR family transcriptional regulator	COORDINATES: similar to AA sequence:RefSeq:NP_814286.1
AR682_02190	preop_v2_contig2	273649	274138	hypothetical protein	COORDINATES: similar to AA sequence:RefSeq:NP_814287.1
AR682_02195	preop_v2_contig2	274729	274996	hypothetical protein	COORDINATES: similar to AA sequence:RefSeq:NP_814288.1
AR682_02200	preop_v2_contig2	275028	275529	molecular chaperone DnaJ	COORDINATES: similar to AA sequence:RefSeq:NP_814289.1
AR682_02205	preop_v2_contig2	275541	275790	RNA-binding protein	COORDINATES: similar to AA sequence:RefSeq:NP_814290.1
AR682_02210	preop_v2_contig2	275865	276282	single-stranded DNA-binding protein	COORDINATES: similar to AA sequence:RefSeq:NP_814291.1
AR682_02215	preop_v2_contig2	276305	276890	thermonuclease	COORDINATES: similar to AA sequence:RefSeq:NP_814292.1
AR682_02220	preop_v2_contig2	277000	277267	type II toxin-antitoxin system antitoxin, RelB/DinJ family	COORDINATES: similar to AA sequence:RefSeq:NP_814293.1
AR682_02225	preop_v2_contig2	277259	277535	type II toxin-antitoxin system mRNA interferase toxin, RelE/StbE family	COORDINATES: similar to AA sequence:RefSeq:NP_814294.1
AR682_02235	preop_v2_contig2	278502	279385	IS256 family transposase	COORDINATES: similar to AA sequence:RefSeq:WP_000997695.1
AR682_02240	preop_v2_contig2	279689	280727	PTS sugar transporter subunit IIC	COORDINATES: similar to AA sequence:RefSeq:NP_814295.1
AR682_02245	preop_v2_contig2	280752	281691	2-dehydropantoate 2-reductase	COORDINATES: similar to AA sequence:RefSeq:NP_814296.1
AR682_02250	preop_v2_contig2	281818	282148	cell surface protein	COORDINATES: similar to AA sequence:RefSeq:NP_814297.1
AR682_02255	preop_v2_contig2	282177	282363	hypothetical protein	COORDINATES: similar to AA sequence:RefSeq:NP_814298.1
AR682_02260	preop_v2_contig2	282394	283022	IS6 family transposase	COORDINATES: similar to AA sequence:RefSeq:WP_002340533.1
AR682_02265	preop_v2_contig2	283034	283229	hypothetical protein	COORDINATES: similar to AA sequence:RefSeq:WP_002358658.1
AR682_02270	preop_v2_contig2	283671	284646	choloylglycine hydrolase	COORDINATES: similar to AA sequence:RefSeq:NP_814299.1
AR682_02275	preop_v2_contig2	284827	285514	IS6 family transposase	COORDINATES: similar to AA sequence:RefSeq:NP_816937.1
AR682_02280	preop_v2_contig2	285581	286001	hypothetical protein	COORDINATES: similar to AA sequence:RefSeq:NP_814300.1
AR682_02285	preop_v2_contig2	286338	286539	transcriptional regulator	COORDINATES: similar to AA sequence:RefSeq:NP_814301.1
AR682_02290	preop_v2_contig2	286539	286824	hypothetical protein	COORDINATES: similar to AA sequence:RefSeq:WP_002358178.1
AR682_02295	preop_v2_contig2	286942	287149	type 2 lantibiotic	COORDINATES: similar to AA sequence:RefSeq:NP_814302.1
AR682_02300	preop_v2_contig2	287182	287374	type 2 lantibiotic	COORDINATES: similar to AA sequence:RefSeq:NP_814303.1
AR682_02305	preop_v2_contig2	287434	290416	type 2 lantipeptide synthetase LanM	COORDINATES: similar to AA sequence:RefSeq:NP_814304.1
AR682_02310	preop_v2_contig2	290427	>291251	ABC transporter ATP-binding protein	COORDINATES: similar to AA sequence:RefSeq:WP_002415198.1
AR682_02315	preop_v2_contig3	20	938	YSIRK-targeted surface antigen transcriptional regulator	COORDINATES: similar to AA sequence:RefSeq:NP_814306.1
AR682_02320	preop_v2_contig3	1067	1484	hypothetical protein	COORDINATES: similar to AA sequence:RefSeq:NP_814307.1
AR682_02325	preop_v2_contig3	1513	1636	hypothetical protein	COORDINATES: similar to AA sequence:RefSeq:NP_814308.1
AR682_02330	preop_v2_contig3	1780	2446	hypothetical protein	COORDINATES: similar to AA sequence:RefSeq:NP_814309.1
AR682_02335	preop_v2_contig3	2491	3112	resolvase	COORDINATES: similar to AA sequence:RefSeq:WP_016616848.1
AR682_02340	preop_v2_contig3	3336	3915	transposon DNA-invertase	COORDINATES: similar to AA sequence:RefSeq:WP_002358528.1
AR682_02345	preop_v2_contig3	4023	4206	hypothetical protein	COORDINATES: similar to AA sequence:RefSeq:WP_002358529.1
AR682_02350	preop_v2_contig3	4661	5480	RpiR family transcriptional regulator	COORDINATES: similar to AA sequence:RefSeq:NP_814311.1
AR682_02355	preop_v2_contig3	5635	6343	N-acetylmannosamine-6-phosphate 2-epimerase	COORDINATES: similar to AA sequence:RefSeq:NP_814312.1
AR682_02360	preop_v2_contig3	6335	7838	PTS glucose transporter subunit IIBC	COORDINATES: similar to AA sequence:RefSeq:WP_010759843.1
AR682_02365	preop_v2_contig3	7848	8331	sugar permease	COORDINATES: similar to AA sequence:RefSeq:WP_002397631.1
AR682_02370	preop_v2_contig3	8963	9728	YibE/F family protein	COORDINATES: similar to AA sequence:RefSeq:NP_814313.1
AR682_02375	preop_v2_contig3	9724	10768	YibE/F family protein	COORDINATES: similar to AA sequence:RefSeq:NP_814314.1
AR682_02395	preop_v2_contig3	12340	13411	ammonium transporter	COORDINATES: similar to AA sequence:RefSeq:NP_814318.1
AR682_02400	preop_v2_contig3	13513	14647	pyridine nucleotide-disulfide oxidoreductase	COORDINATES: similar to AA sequence:RefSeq:NP_814319.1
AR682_02405	preop_v2_contig3	14847	14976	PTS lactose transporter subunit IIC	COORDINATES: similar to AA sequence:RefSeq:WP_002414836.1
AR682_02410	preop_v2_contig3	15715	16027	hypothetical protein	COORDINATES: protein motif:HMM:PF00665.24
AR682_02415	preop_v2_contig3	16132	16372	hypothetical protein	COORDINATES: protein motif:HMM:PF13276.4
AR682_02420	preop_v2_contig3	16386	16675	transposase	COORDINATES: similar to AA sequence:RefSeq:WP_003106754.1
AR682_02425	preop_v2_contig3	16915	18082	MarR family transcriptional regulator	COORDINATES: similar to AA sequence:RefSeq:NP_814320.1
AR682_02430	preop_v2_contig3	18448	20515	glycosyl hydrolase	COORDINATES: similar to AA sequence:RefSeq:NP_814321.1
AR682_02435	preop_v2_contig3	20514	21300	PTS sugar transporter subunit IIC	COORDINATES: similar to AA sequence:RefSeq:NP_814322.1
AR682_02440	preop_v2_contig3	21292	22105	PTS trehalose transporter subunit IIBC	COORDINATES: similar to AA sequence:RefSeq:NP_814323.1
AR682_02445	preop_v2_contig3	22129	22612	PTS mannose/fructose/sorbose transporter subunit IIB	COORDINATES: similar to AA sequence:RefSeq:NP_814324.1
AR682_02450	preop_v2_contig3	22623	23031	PTS mannose transporter subunit IIA	COORDINATES: similar to AA sequence:RefSeq:NP_814325.1
AR682_02455	preop_v2_contig3	23135	24443	xylose isomerase	COORDINATES: similar to AA sequence:RefSeq:NP_814326.1
AR682_02460	preop_v2_contig3	24504	25995	xylulokinase	COORDINATES: similar to AA sequence:RefSeq:NP_814327.1
AR682_02465	preop_v2_contig3	26878	28462	polysaccharide biosynthesis protein	COORDINATES: similar to AA sequence:RefSeq:NP_814328.1
AR682_02470	preop_v2_contig3	28908	29203	CylI	COORDINATES: similar to AA sequence:RefSeq:WP_002419539.1
AR682_02475	preop_v2_contig3	29475	29772	hypothetical protein	COORDINATES: similar to AA sequence:RefSeq:WP_002419540.1
AR682_02480	preop_v2_contig3	30585	30876	hypothetical protein	COORDINATES: similar to AA sequence:RefSeq:NP_814329.1
AR682_02485	preop_v2_contig3	31022	31298	hypothetical protein	COORDINATES: similar to AA sequence:RefSeq:WP_002402902.1
AR682_02495	preop_v2_contig3	31645	31813	hypothetical protein	COORDINATES: similar to AA sequence:RefSeq:NP_814331.1
AR682_02500	preop_v2_contig3	31964	32210	hypothetical protein	COORDINATES: similar to AA sequence:RefSeq:NP_814332.1
AR682_02505	preop_v2_contig3	32695	34372	potassium-transporting ATPase subunit A	COORDINATES: similar to AA sequence:RefSeq:NP_814333.1
AR682_02510	preop_v2_contig3	34387	36418	potassium-transporting ATPase subunit B	COORDINATES: similar to AA sequence:RefSeq:NP_814334.1
AR682_02515	preop_v2_contig3	36431	36962	potassium-transporting ATPase subunit C	COORDINATES: similar to AA sequence:RefSeq:NP_814335.1
AR682_02520	preop_v2_contig3	37048	39601	two-component sensor histidine kinase	COORDINATES: similar to AA sequence:RefSeq:NP_814336.1
AR682_02525	preop_v2_contig3	39612	40302	DNA-binding response regulator	COORDINATES: similar to AA sequence:RefSeq:NP_814337.1
AR682_02530	preop_v2_contig3	40329	40593	hypothetical protein	COORDINATES: similar to AA sequence:RefSeq:WP_002417126.1
AR682_02540	preop_v2_contig3	44370	44646	hypothetical protein	COORDINATES: similar to AA sequence:RefSeq:WP_005879001.1
AR682_02545	preop_v2_contig3	44658	44919	PTS sugar transporter subunit IIA	COORDINATES: similar to AA sequence:RefSeq:WP_002358571.1
AR682_02550	preop_v2_contig3	45389	47000	hypothetical protein	COORDINATES: similar to AA sequence:RefSeq:NP_814338.1
AR682_02555	preop_v2_contig3	47082	47187	hypothetical protein	COORDINATES: similar to AA sequence:RefSeq:NP_814339.1
AR682_02560	preop_v2_contig3	47600	48320	manganese ABC transporter ATP-binding protein	COORDINATES: similar to AA sequence:RefSeq:NP_814340.1
AR682_02565	preop_v2_contig3	48321	49164	metal ABC transporter permease	COORDINATES: similar to AA sequence:RefSeq:NP_814341.1
AR682_02570	preop_v2_contig3	49160	50111	metal ABC transporter substrate-binding protein	COORDINATES: similar to AA sequence:RefSeq:NP_814342.1
AR682_02575	preop_v2_contig3	50125	50359	iron-dependent repressor	COORDINATES: similar to AA sequence:RefSeq:NP_814343.1
AR682_02580	preop_v2_contig3	50689	51274	TetR/AcrR family transcriptional regulator	COORDINATES: similar to AA sequence:RefSeq:WP_002364863.1
AR682_02585	preop_v2_contig3	51403	52072	cobalt transporter	COORDINATES: similar to AA sequence:RefSeq:NP_814345.1
AR682_02590	preop_v2_contig3	52073	53498	ABC transporter ATP-binding protein	COORDINATES: similar to AA sequence:RefSeq:NP_814346.1
AR682_02595	preop_v2_contig3	53515	54085	hypothetical protein	COORDINATES: similar to AA sequence:RefSeq:NP_814347.1
AR682_02600	preop_v2_contig3	54194	55949	ABC transporter ATP-binding protein	COORDINATES: similar to AA sequence:RefSeq:NP_814348.1
AR682_02605	preop_v2_contig3	55932	57675	ABC transporter ATP-binding protein	COORDINATES: similar to AA sequence:RefSeq:NP_814349.1
AR682_02610	preop_v2_contig3	58197	58467	30S ribosomal protein S14	COORDINATES: similar to AA sequence:RefSeq:NP_814350.1
AR682_02615	preop_v2_contig3	58481	58661	50S ribosomal protein L32	COORDINATES: similar to AA sequence:RefSeq:NP_814351.1
AR682_02620	preop_v2_contig3	58692	59070	hypothetical protein	COORDINATES: similar to AA sequence:RefSeq:NP_814352.1
AR682_02625	preop_v2_contig3	59090	59240	50S ribosomal protein L33	COORDINATES: similar to AA sequence:RefSeq:NP_814353.1
AR682_02630	preop_v2_contig3	59263	59428	hypothetical protein	COORDINATES: similar to AA sequence:RefSeq:NP_814354.1
AR682_02635	preop_v2_contig3	59766	61317	polysaccharide deacetylase	COORDINATES: similar to AA sequence:RefSeq:NP_814355.1
AR682_02640	preop_v2_contig3	61681	65509	peptidase	COORDINATES: similar to AA sequence:RefSeq:WP_002404367.1
AR682_02650	preop_v2_contig3	67153	67813	peptidase	COORDINATES: similar to AA sequence:RefSeq:WP_017771134.1
AR682_02660	preop_v2_contig3	68847	69252	hypothetical protein	COORDINATES: similar to AA sequence:RefSeq:WP_002358592.1
AR682_02665	preop_v2_contig3	69589	71106	IS5/IS1182 family transposase	COORDINATES: similar to AA sequence:RefSeq:WP_002369693.1
AR682_02670	preop_v2_contig3	71347	71578	hypothetical protein	COORDINATES: similar to AA sequence:RefSeq:NP_814358.1
AR682_02675	preop_v2_contig3	71714	72338	TetR family transcriptional regulator	COORDINATES: similar to AA sequence:RefSeq:NP_814359.1
AR682_02680	preop_v2_contig3	72345	72990	TetR family transcriptional regulator	COORDINATES: similar to AA sequence:RefSeq:NP_814360.1
AR682_02685	preop_v2_contig3	73168	73483	hypothetical protein	COORDINATES: similar to AA sequence:RefSeq:WP_002382909.1
AR682_02690	preop_v2_contig3	73517	73976	hypothetical protein	COORDINATES: protein motif:HMM:PF13683.4
AR682_02695	preop_v2_contig3	74073	74178	hypothetical protein	COORDINATES: similar to AA sequence:RefSeq:WP_002415987.1
AR682_02700	preop_v2_contig3	74505	74697	hypothetical protein	COORDINATES: protein motif:HMM:PF01527.18
AR682_02705	preop_v2_contig3	74938	75424	hypothetical protein	COORDINATES: similar to AA sequence:RefSeq:NP_814361.1
AR682_02710	preop_v2_contig3	75801	76380	Asp23/Gls24 family envelope stress response protein	COORDINATES: similar to AA sequence:RefSeq:NP_814362.1
AR682_02715	preop_v2_contig3	76434	76617	DUF2273 domain-containing protein	COORDINATES: similar to AA sequence:RefSeq:WP_002358600.1
AR682_02720	preop_v2_contig3	76626	77187	alkaline shock response membrane anchor protein AmaP	COORDINATES: similar to AA sequence:RefSeq:NP_814363.1
AR682_02725	preop_v2_contig3	77904	78372	DNA starvation/stationary phase protection protein	COORDINATES: similar to AA sequence:RefSeq:NP_814364.1
AR682_02730	preop_v2_contig3	78506	79040	chromosome partitioning protein ParB	COORDINATES: similar to AA sequence:RefSeq:NP_814365.1
AR682_02735	preop_v2_contig3	79026	79452	hypothetical protein	COORDINATES: similar to AA sequence:RefSeq:NP_814366.1
AR682_02740	preop_v2_contig3	79448	80720	phosphoadenosine phosphosulfate sulfurtransferase	COORDINATES: similar to AA sequence:RefSeq:NP_814367.1
AR682_02745	preop_v2_contig3	81362	81476	hypothetical protein	COORDINATES: similar to AA sequence:RefSeq:NP_814368.1
AR682_02750	preop_v2_contig3	81689	82085	hypothetical protein	COORDINATES: similar to AA sequence:RefSeq:NP_814369.1
AR682_02755	preop_v2_contig3	82359	82635	hypothetical protein	COORDINATES: similar to AA sequence:RefSeq:NP_814370.1
AR682_02760	preop_v2_contig3	82828	82999	hypothetical protein	COORDINATES: similar to AA sequence:RefSeq:NP_814371.1
AR682_02765	preop_v2_contig3	83595	83994	IS200/IS605 family transposase	COORDINATES: similar to AA sequence:RefSeq:WP_002366027.1
AR682_02770	preop_v2_contig3	84119	85100	ornithine cyclodeaminase family protein	COORDINATES: similar to AA sequence:RefSeq:NP_814373.1
AR682_02775	preop_v2_contig3	85112	85991	anion permease	COORDINATES: similar to AA sequence:RefSeq:NP_814374.1
AR682_02780	preop_v2_contig3	86005	86806	transcriptional regulator	COORDINATES: similar to AA sequence:RefSeq:NP_814375.1
AR682_02785	preop_v2_contig3	87133	87229	hypothetical protein	COORDINATES: similar to AA sequence:RefSeq:NP_814376.1
AR682_02790	preop_v2_contig3	87267	87441	serine kinase	COORDINATES: similar to AA sequence:RefSeq:WP_002382922.1
AR682_02795	preop_v2_contig3	87765	87936	hypothetical protein	COORDINATES: similar to AA sequence:RefSeq:NP_814377.1
AR682_02800	preop_v2_contig3	87994	88159	PTS sugar transporter	COORDINATES: similar to AA sequence:RefSeq:NP_814378.1
AR682_02805	preop_v2_contig3	88091	88496	PTS sugar transporter	COORDINATES: similar to AA sequence:RefSeq:WP_002382924.1
AR682_02810	preop_v2_contig3	88509	88830	PTS sugar transporter	COORDINATES: similar to AA sequence:RefSeq:WP_002382925.1
AR682_02815	preop_v2_contig3	88959	90802	heparinase	COORDINATES: similar to AA sequence:RefSeq:NP_815926.1
AR682_02820	preop_v2_contig3	90814	91231	PTS mannose transporter subunit IIA	COORDINATES: similar to AA sequence:RefSeq:NP_814383.1
AR682_02825	preop_v2_contig3	91380	91578	hypothetical protein	COORDINATES: similar to AA sequence:RefSeq:WP_002399757.1
AR682_03710	preop_v2_contig5	72049	72148	hypothetical protein	COORDINATES: similar to AA sequence:RefSeq:WP_016635181.1
AR682_09045	preop_v2_contig5	1137120	1137489	hypothetical protein	COORDINATES: similar to AA sequence:RefSeq:WP_002366894.1
AR682_09050	preop_v2_contig5	1137412	1137859	hypothetical protein	COORDINATES: similar to AA sequence:RefSeq:WP_016618445.1
AR682_09175	preop_v2_contig5	1164260	1165493	MFS transporter	COORDINATES: similar to AA sequence:RefSeq:WP_005880194.1
AR682_11820	preop_v2_contig7	278081	278283	hypothetical protein	COORDINATES: similar to AA sequence:RefSeq:WP_016630483.1
AR682_12800	preop_v2_contig7	473666	477050	hypothetical protein	COORDINATES: similar to AA sequence:RefSeq:NP_816687.1
AR682_13250	preop_v2_contig8	19442	>20474	hypothetical protein	COORDINATES: similar to AA sequence:RefSeq:NP_816777.1
